# Supplementary material for: The p97–Ataxin 3 complex regulates homeostasis of the DNA damage response E3 ubiquitin ligase RNF8
Source: PubMed Central journal article supplement (PMC6826192; doi:10.15252/embj.2019102361), 2019-10-15

Figure 2A

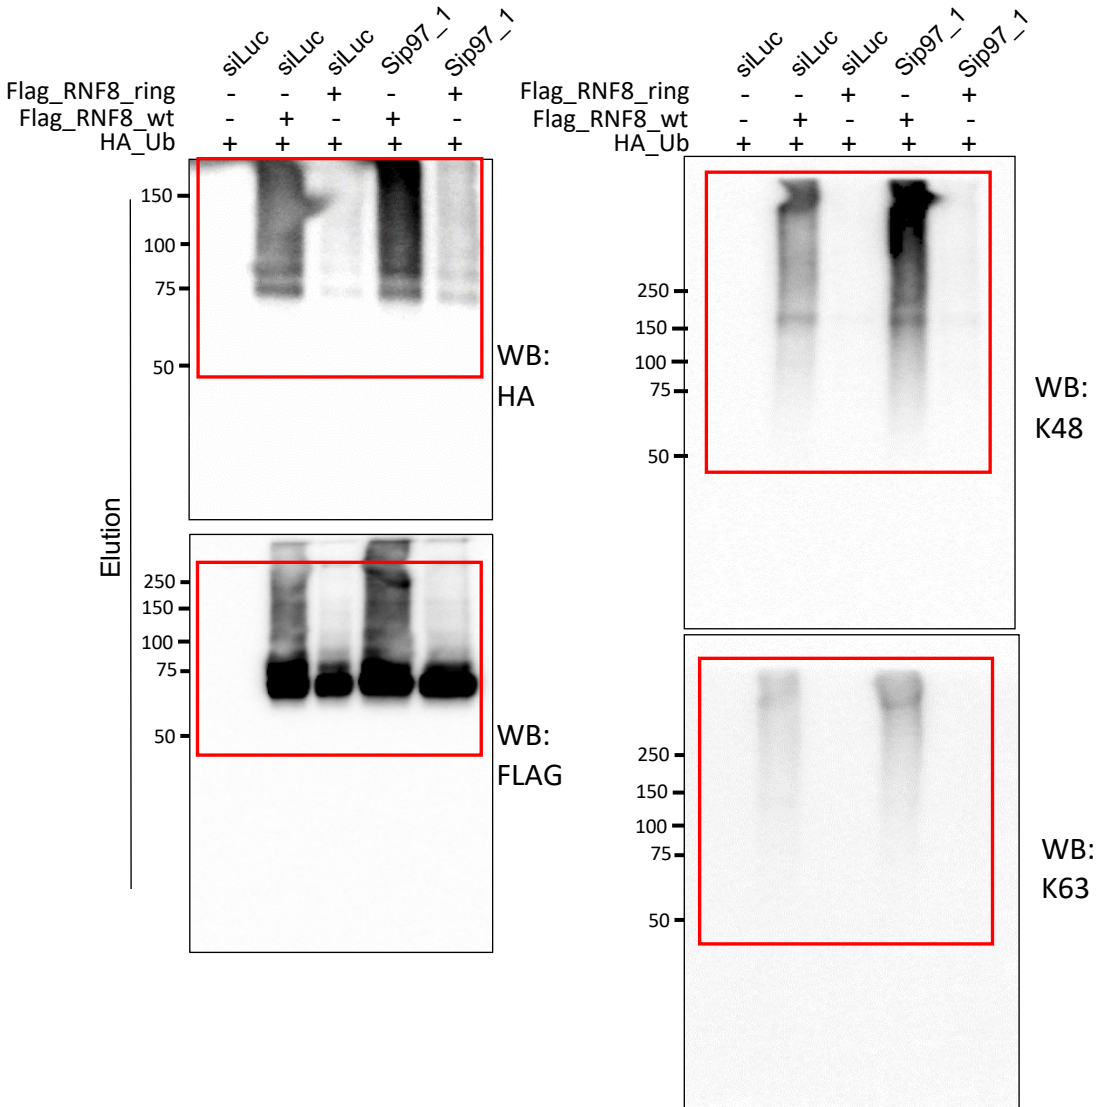

Figure 2B

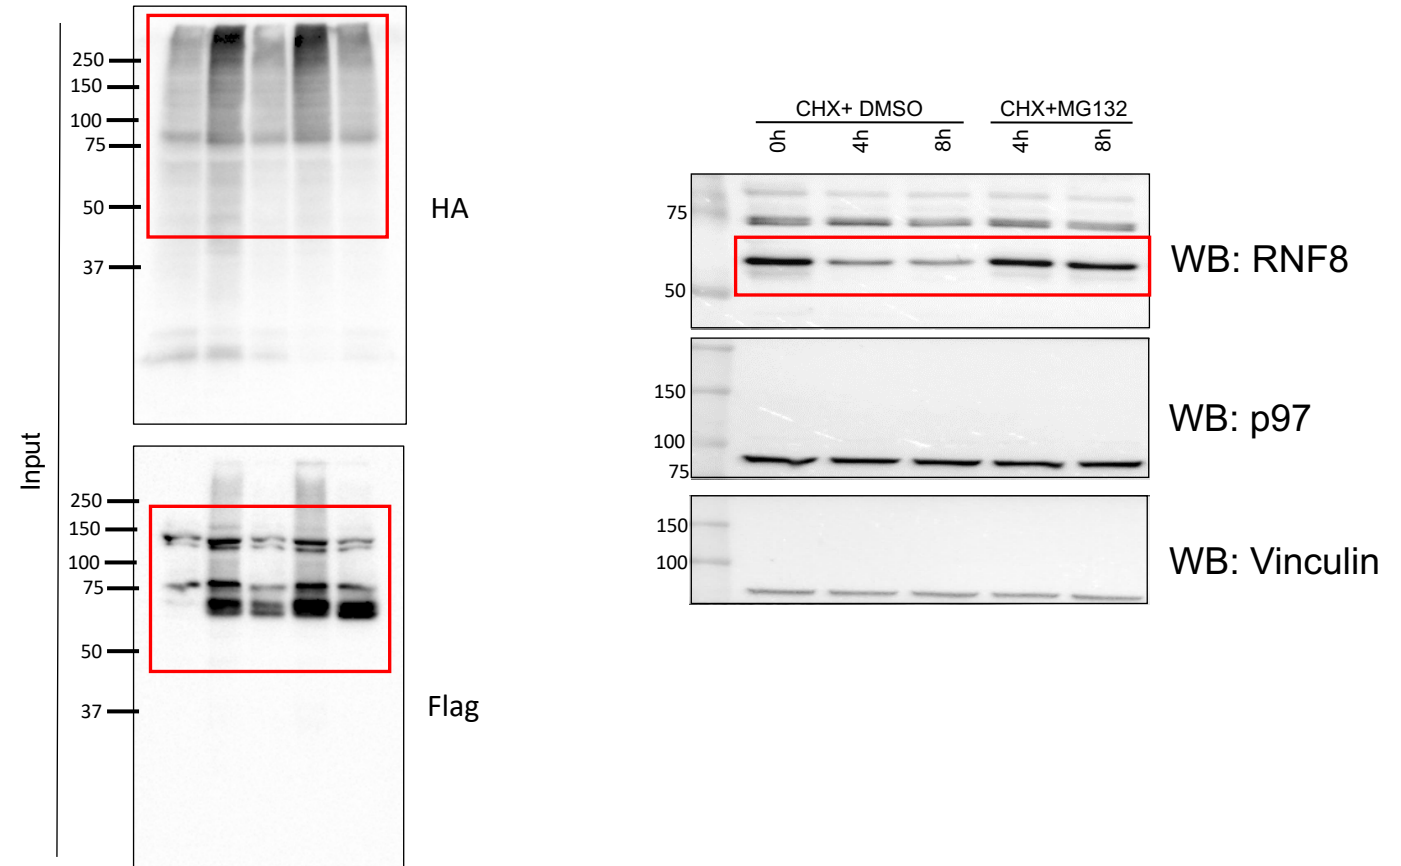

Figure 2D

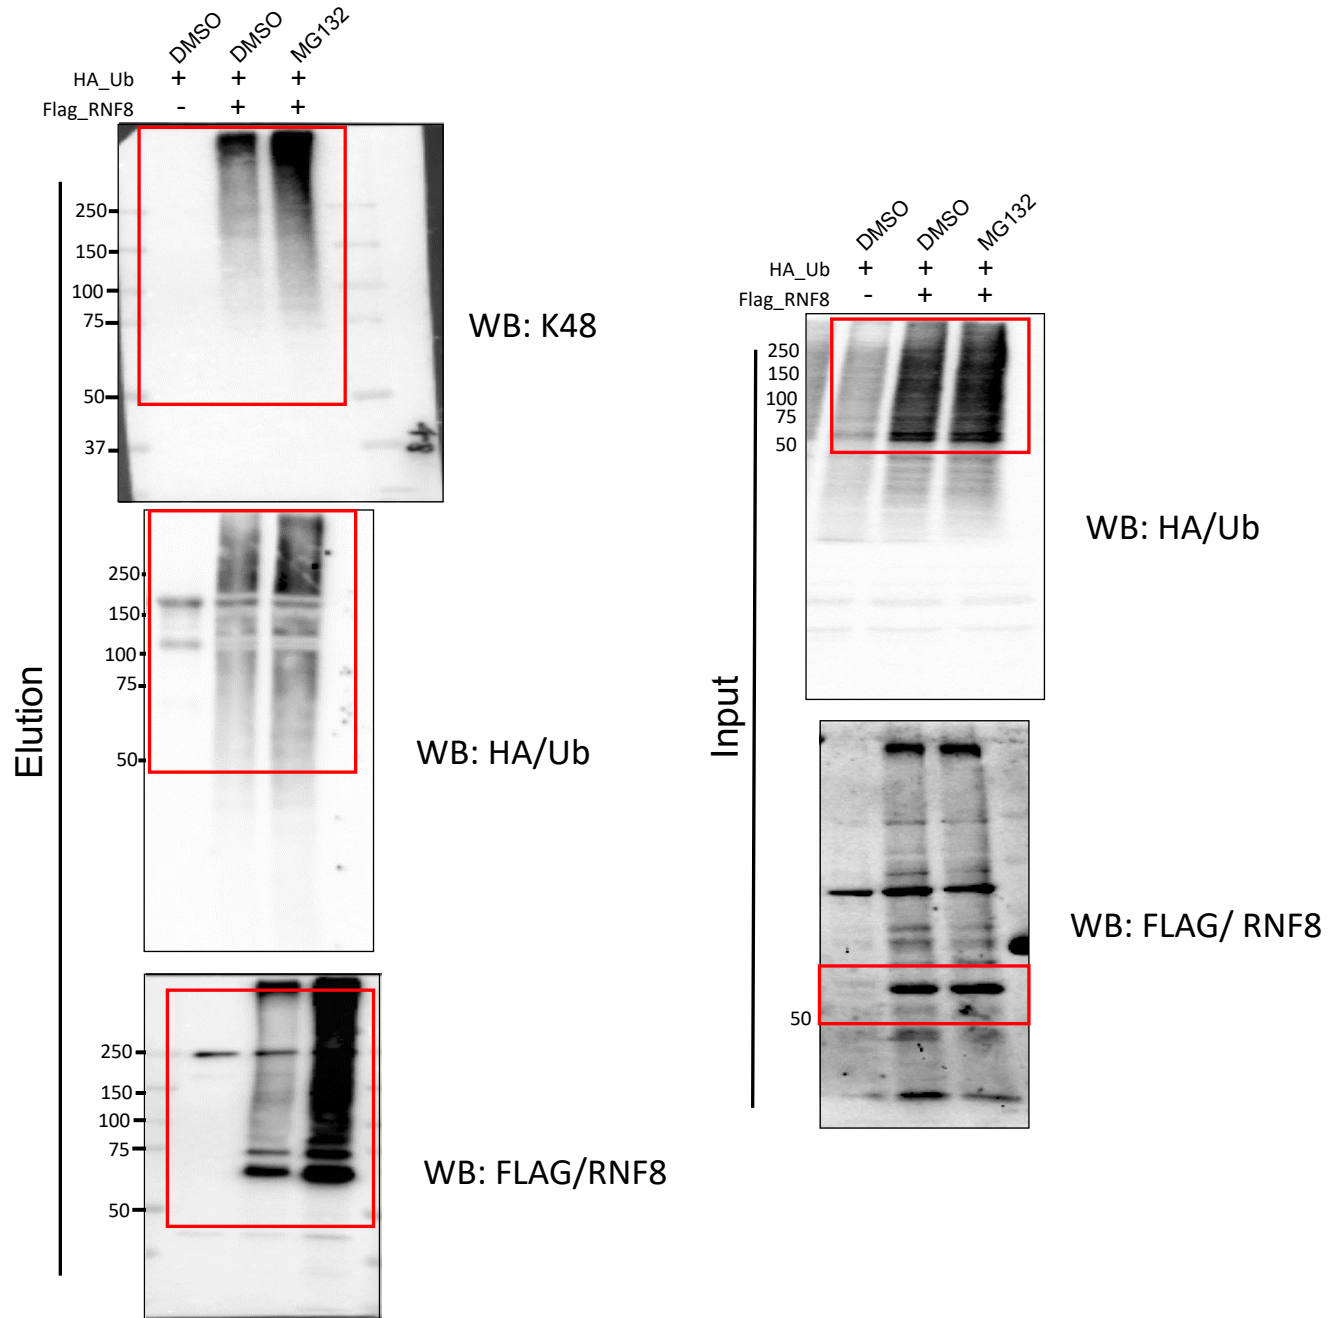

Figure 2E

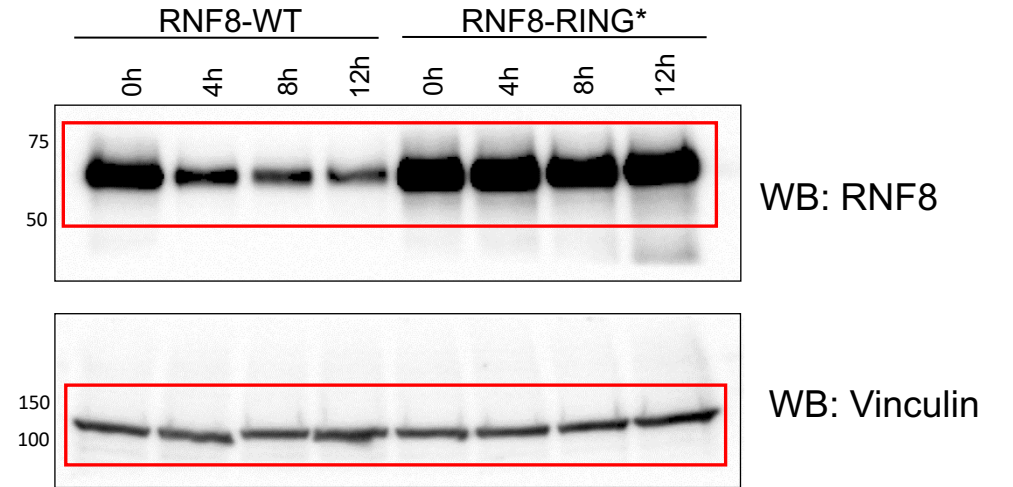

Supplement: EMBJ-38-e102361-s005.pdf [file EMBJ-38-e102361-s005.pdf]
